# Supplementary material for: Quantitative TaqMan® real-time PCR assays for gene expression normalisation in feline tissues
Source: Springer Nature journal article supplement (doi:10.1186/1471-2199-10-106), 2009-12-01

**Additional File 2**  
**a) geNorm output: Adrenal gland**

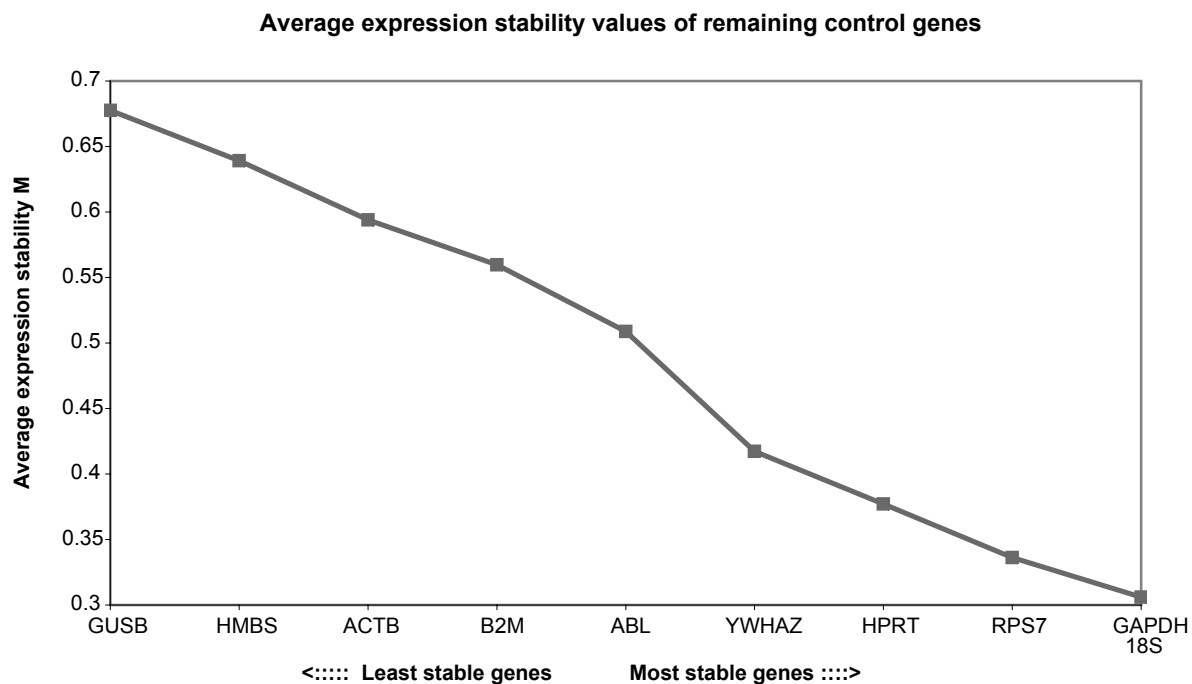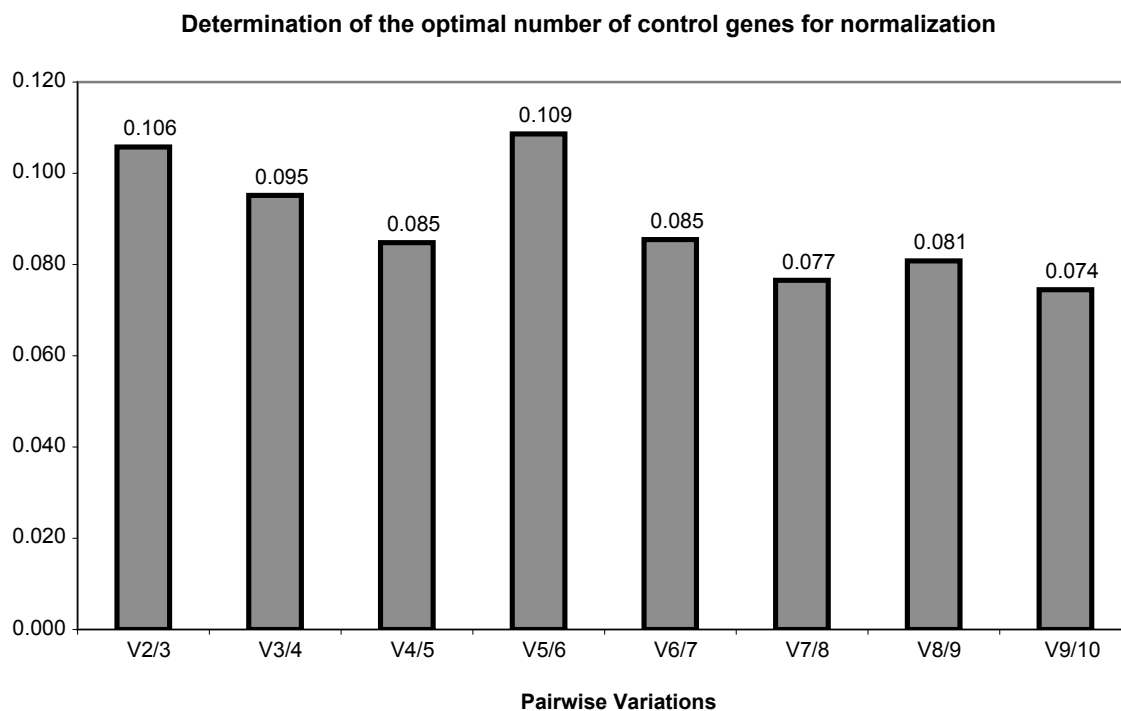

**Additional File 2**  
**b) geNorm output: Pancreas**

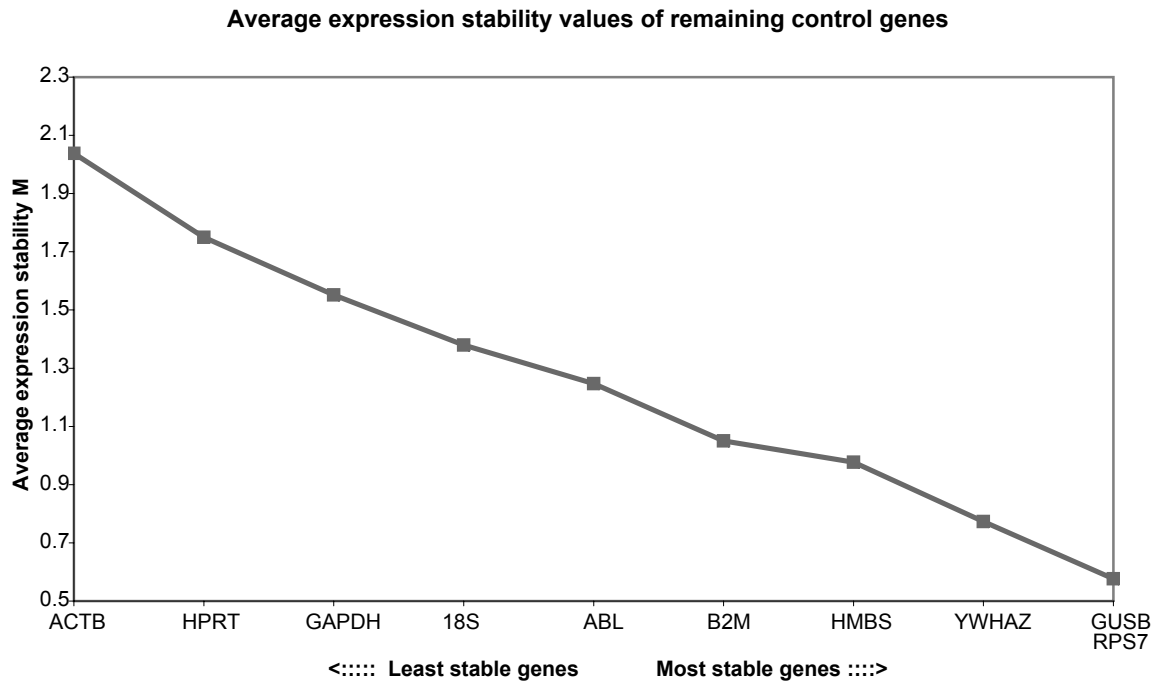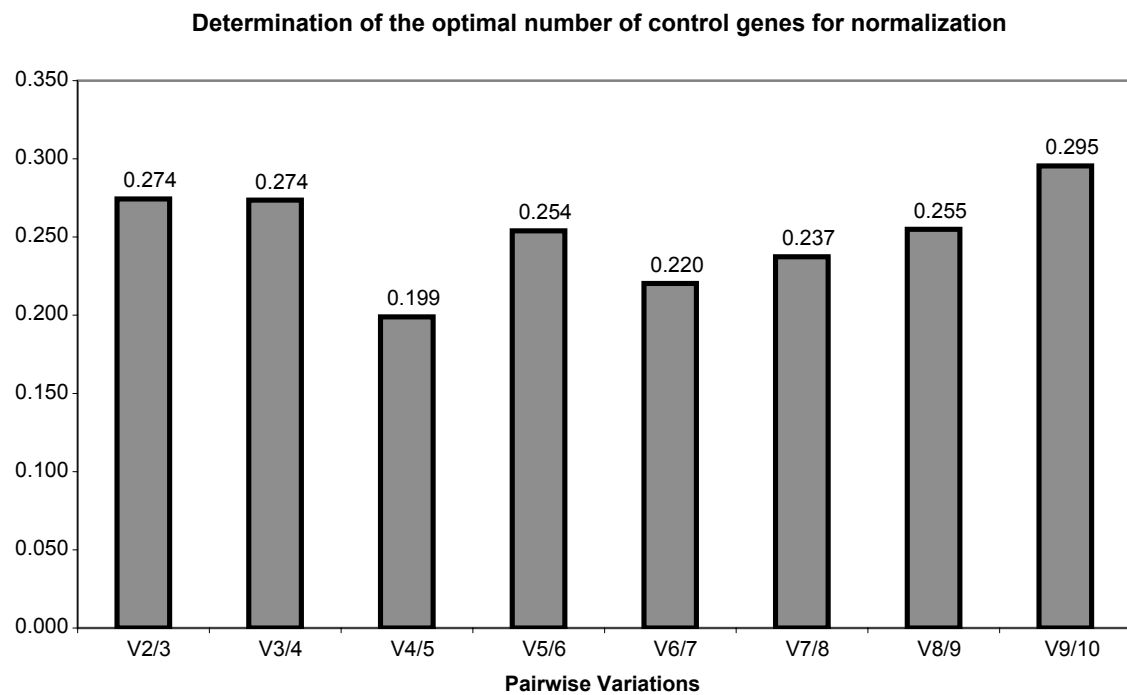

**Additional File 2**

**c) geNorm output: Parathyroid**

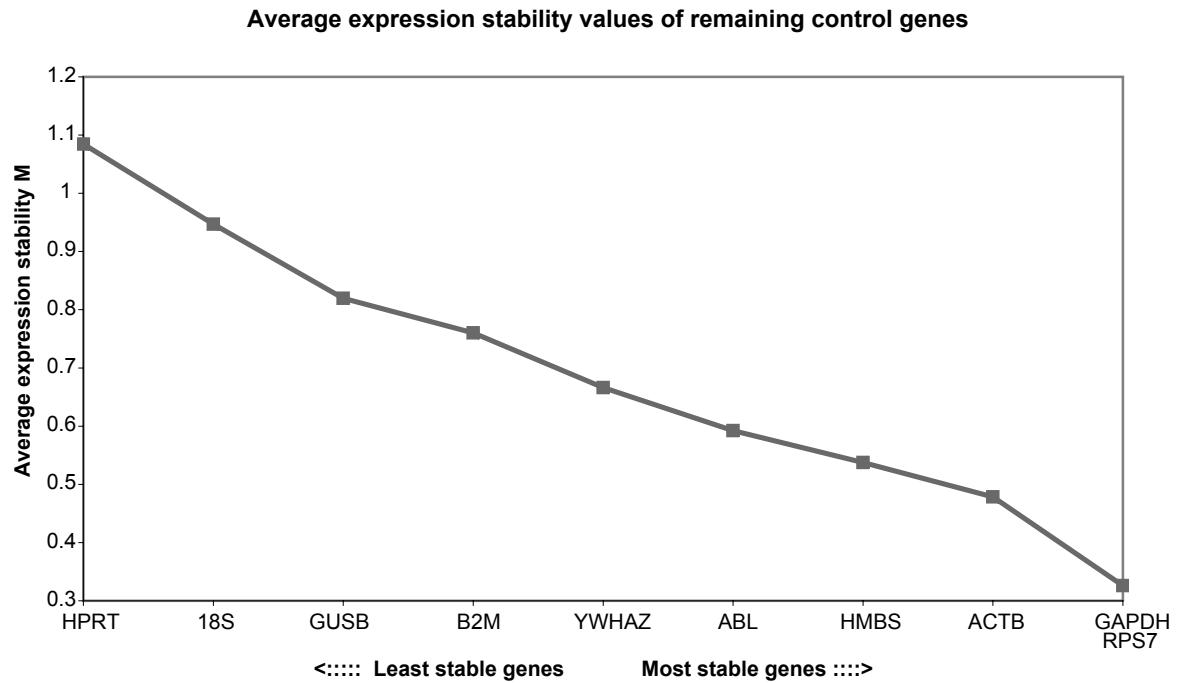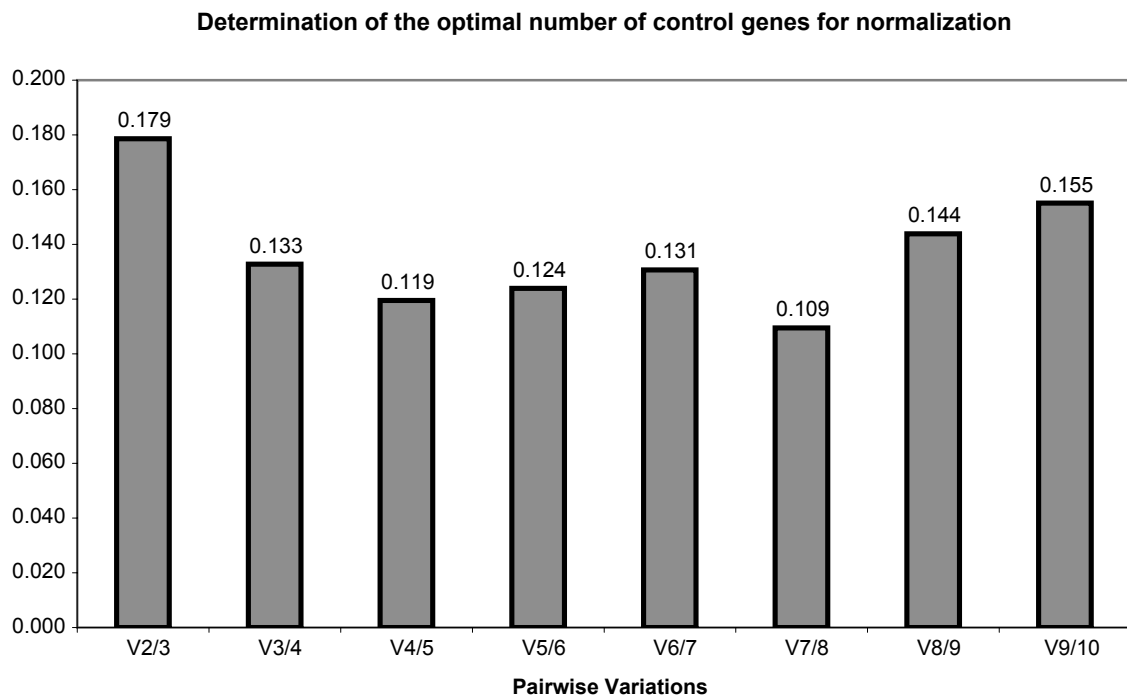

**Additional File 2**  
**d) geNorm output: Thyroid**

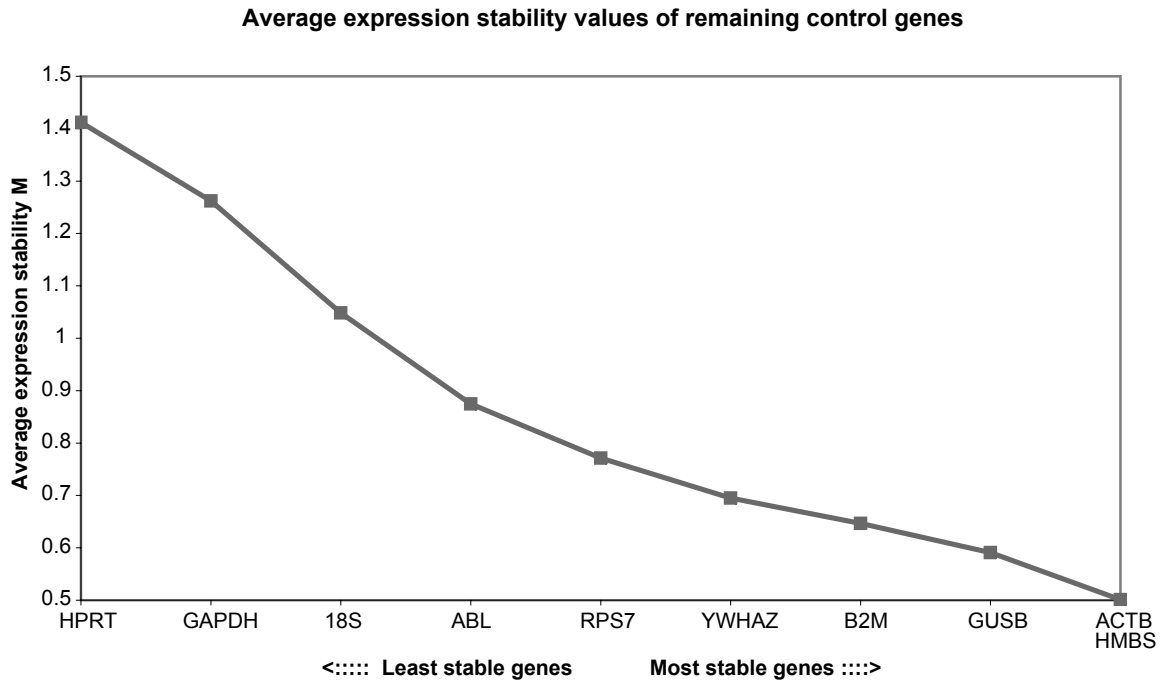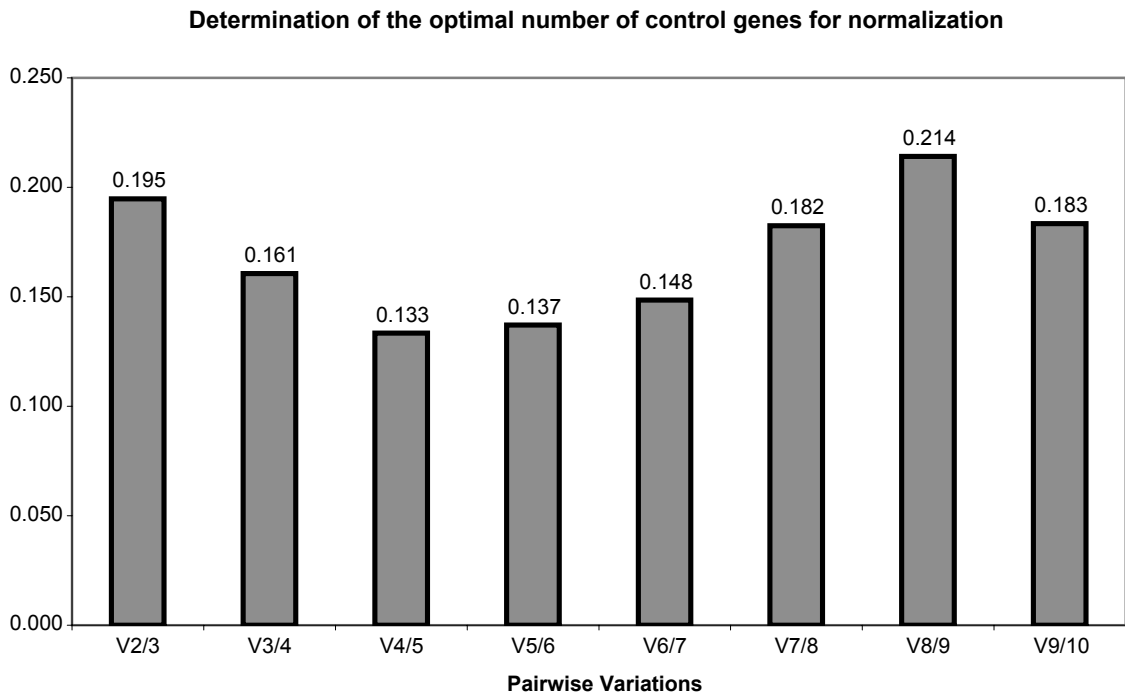

**Additional File 2**  
**e) geNorm output: Bone marrow**

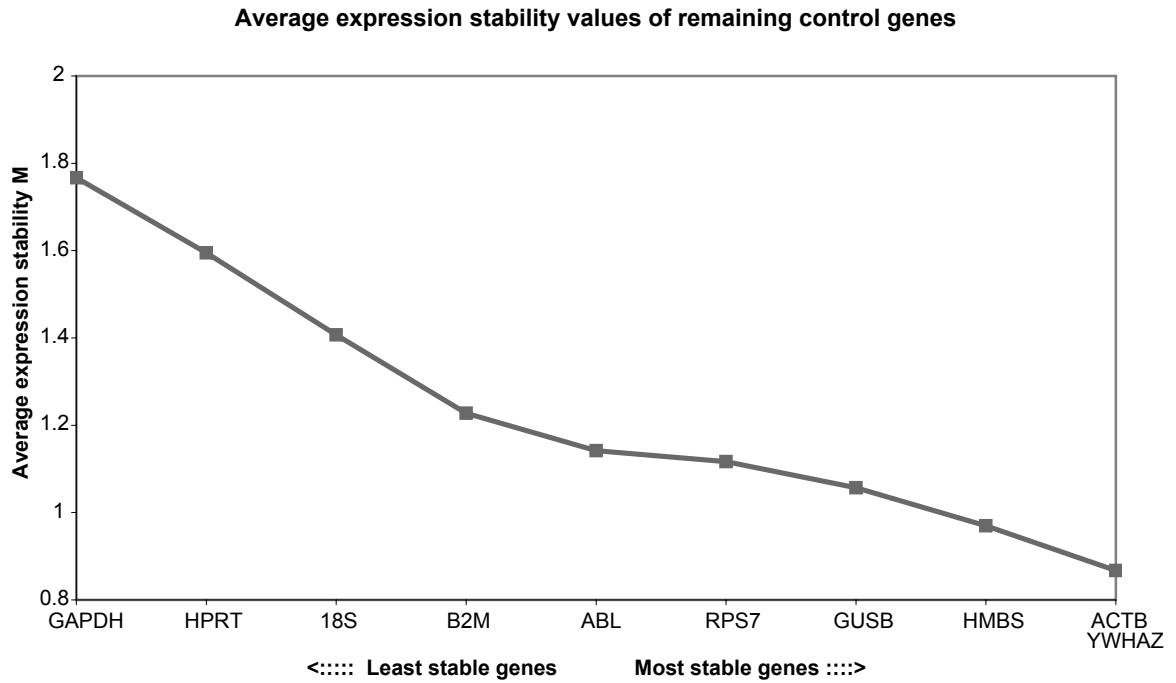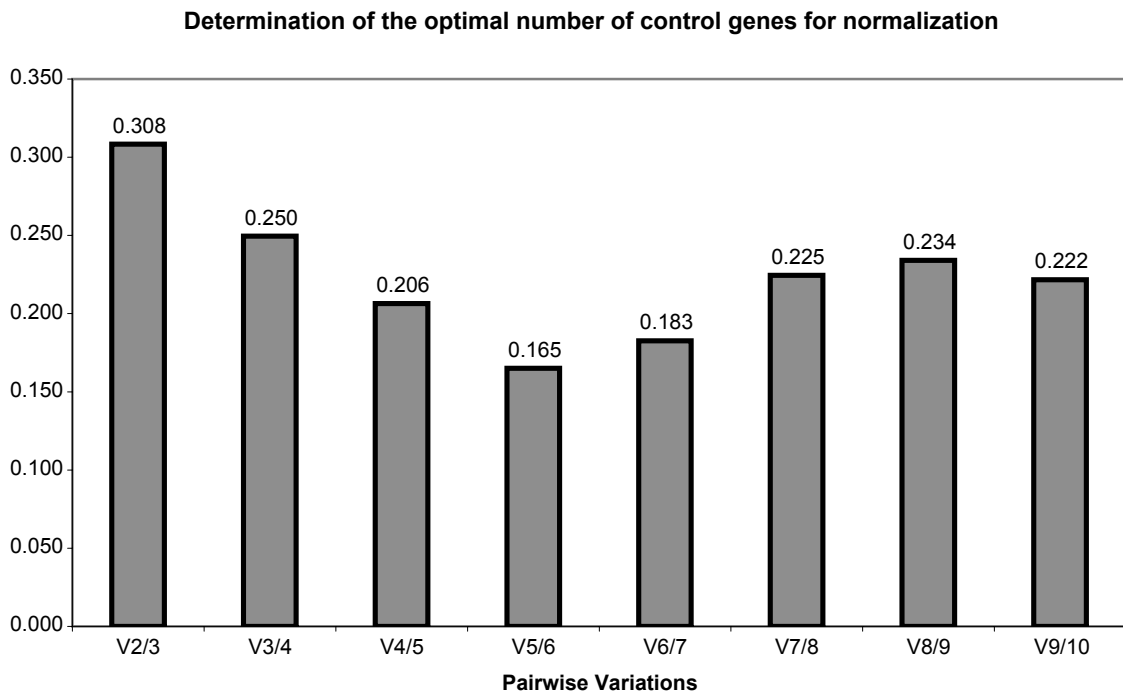

**Additional File 2**

**f) geNorm output: Mesenteric lymph node**

**Average expression stability values of remaining control genes**

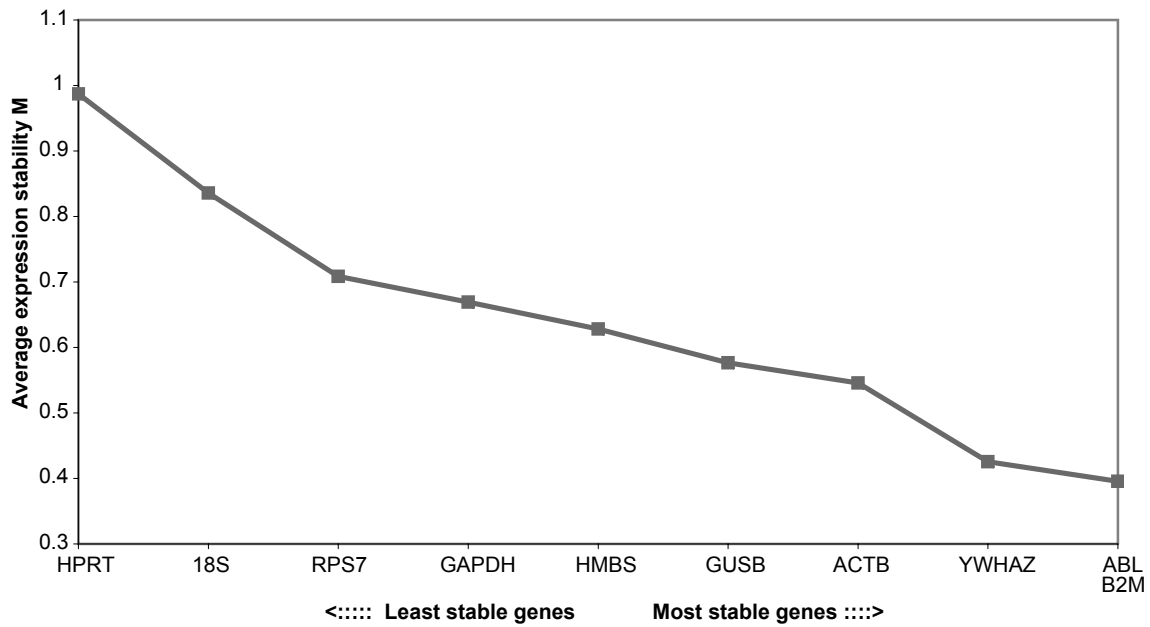

**Determination of the optimal number of control genes for normalization**

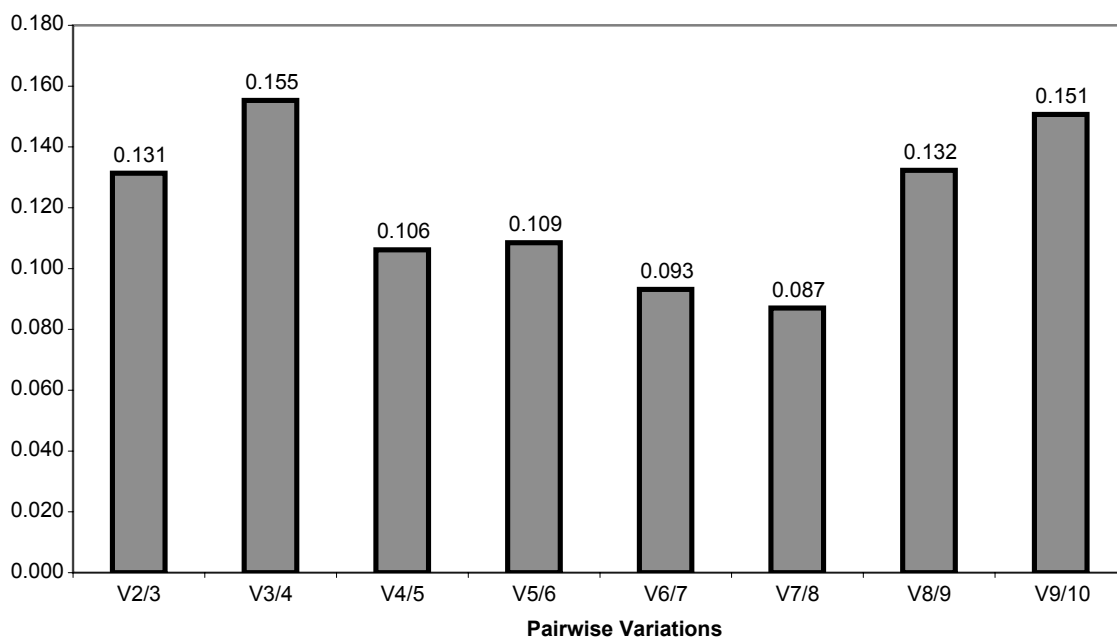

**Additional File 2**  
**g) geNorm output: Spleen**

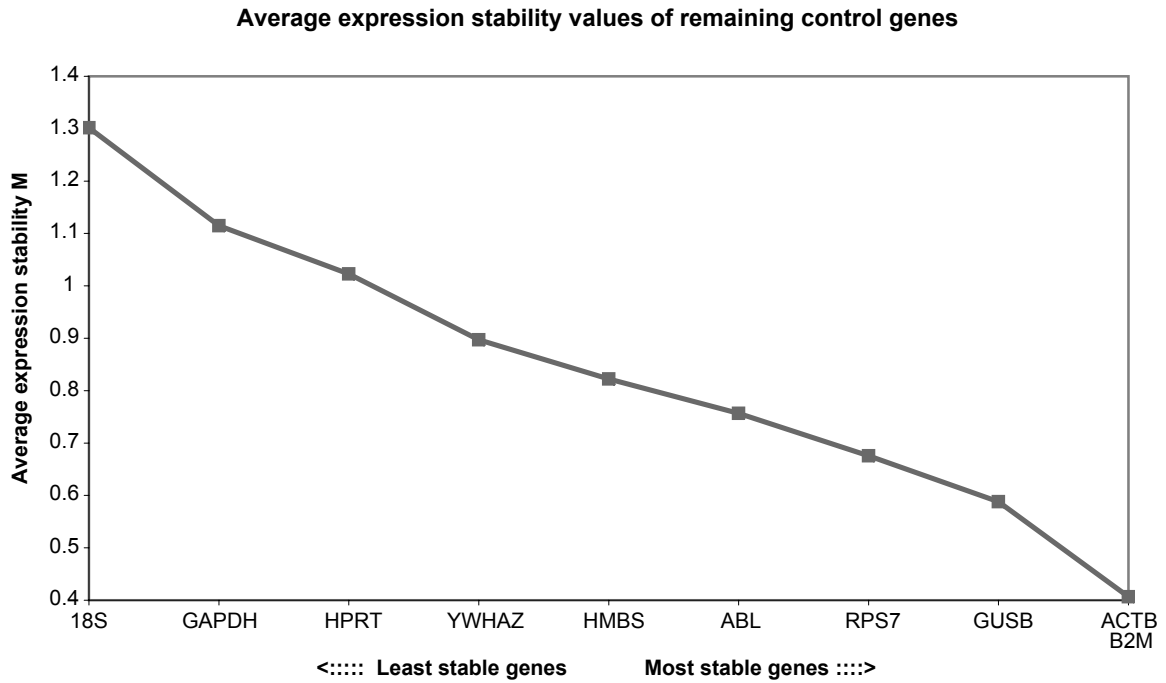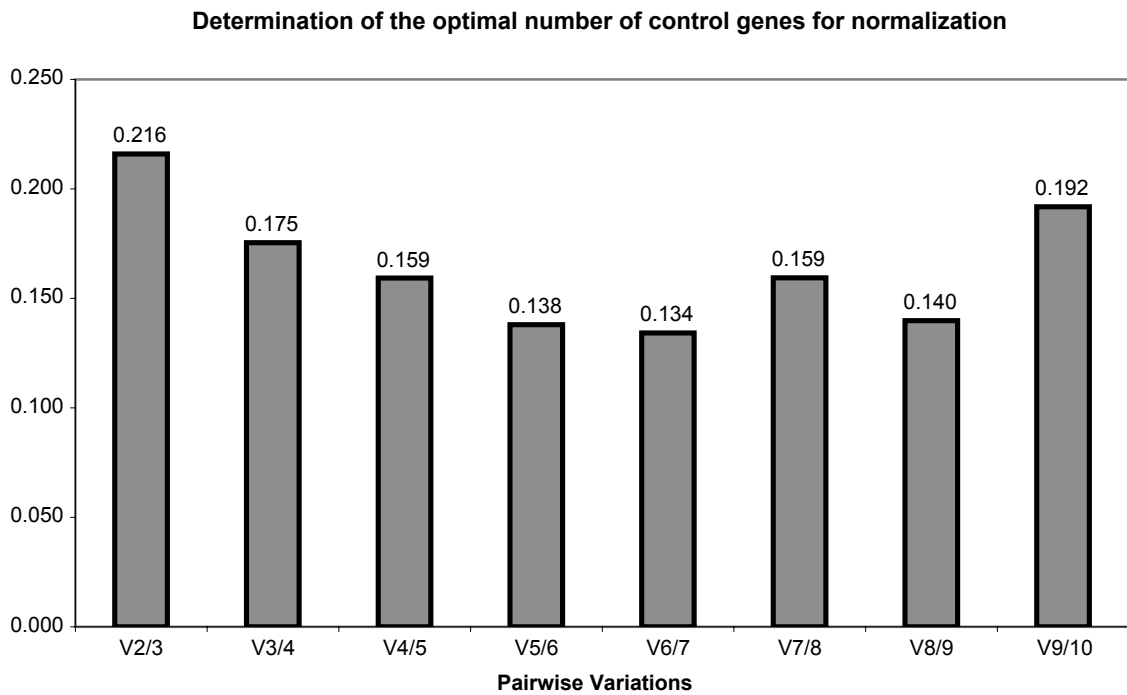

**Additional File 2**

**h) geNorm output: Parotid gland**

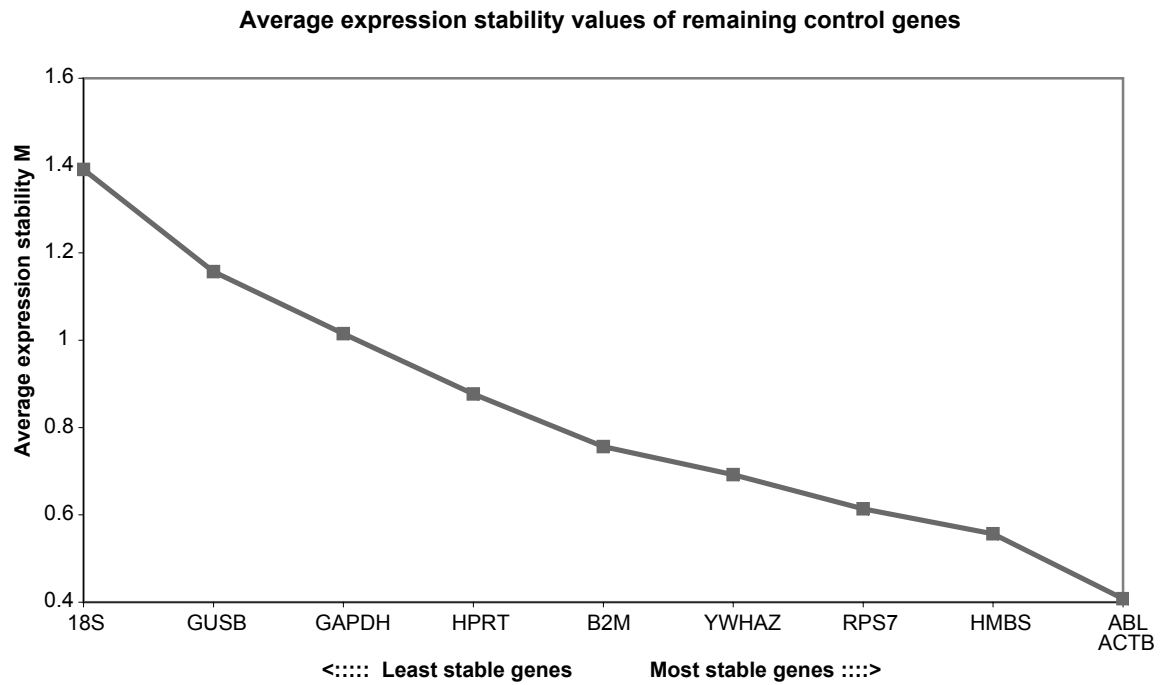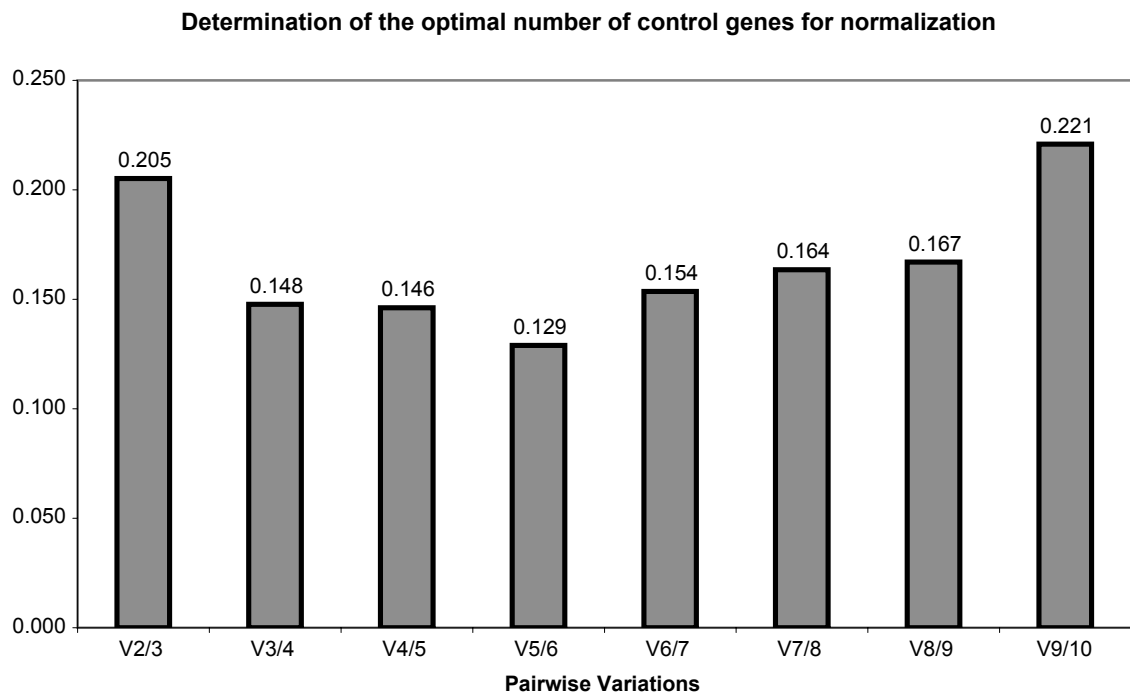

**Additional File 2**

**i) geNorm output: Duodenum**

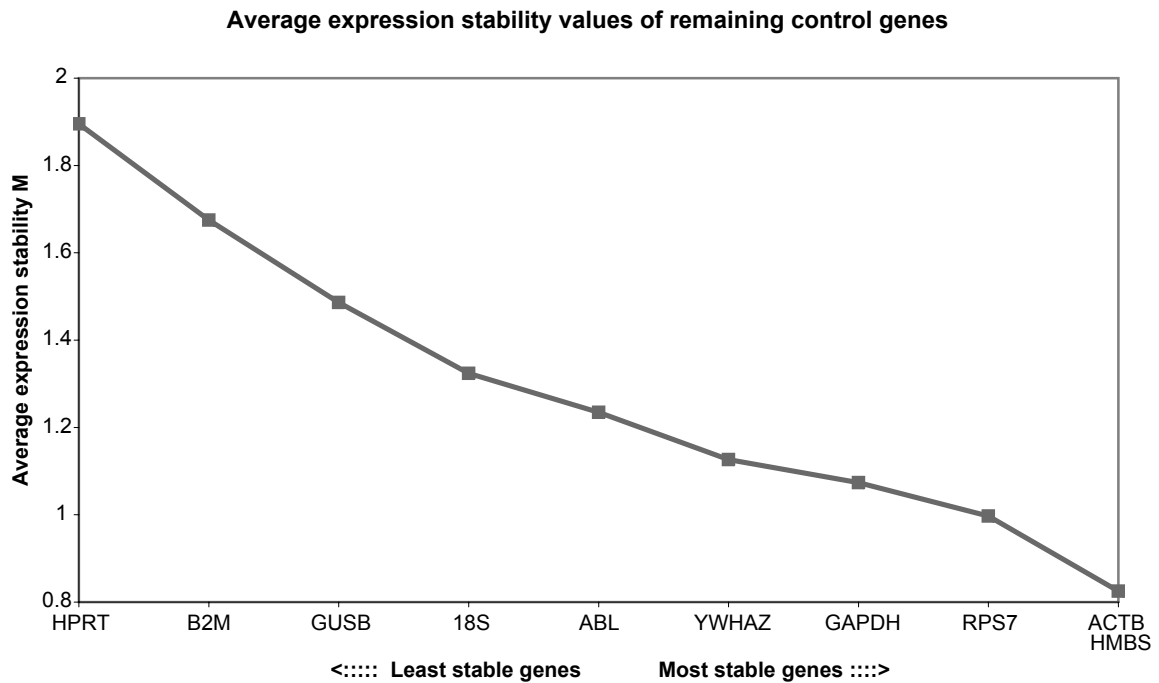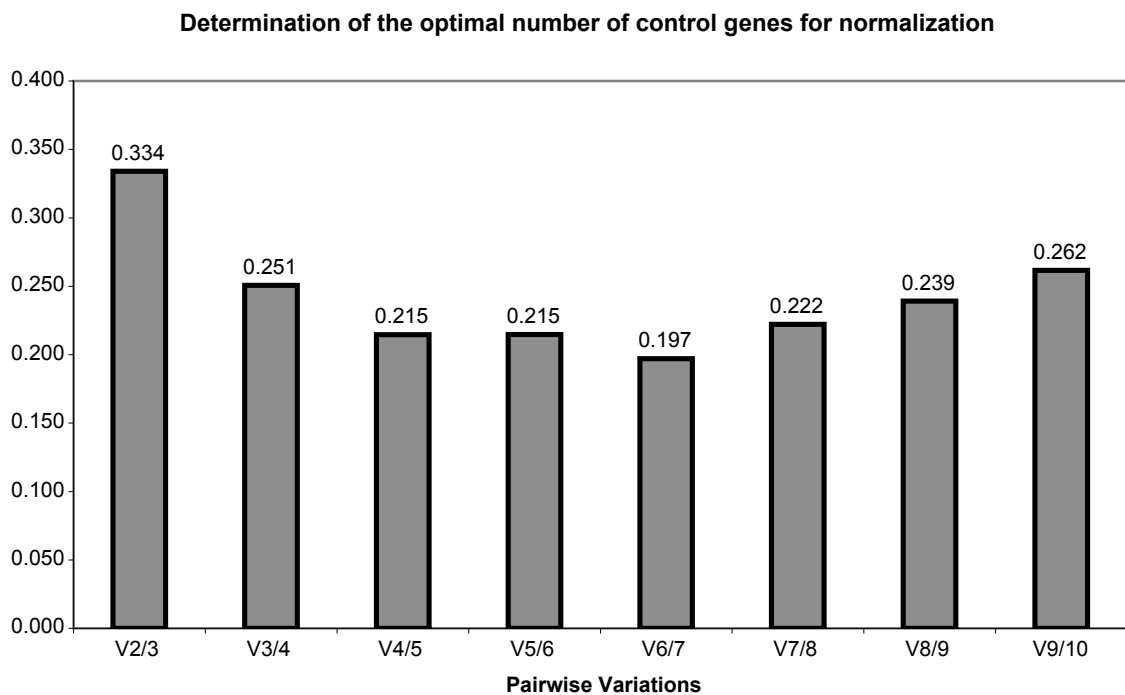

**Additional File 2**  
**j) geNorm output: Ileum**

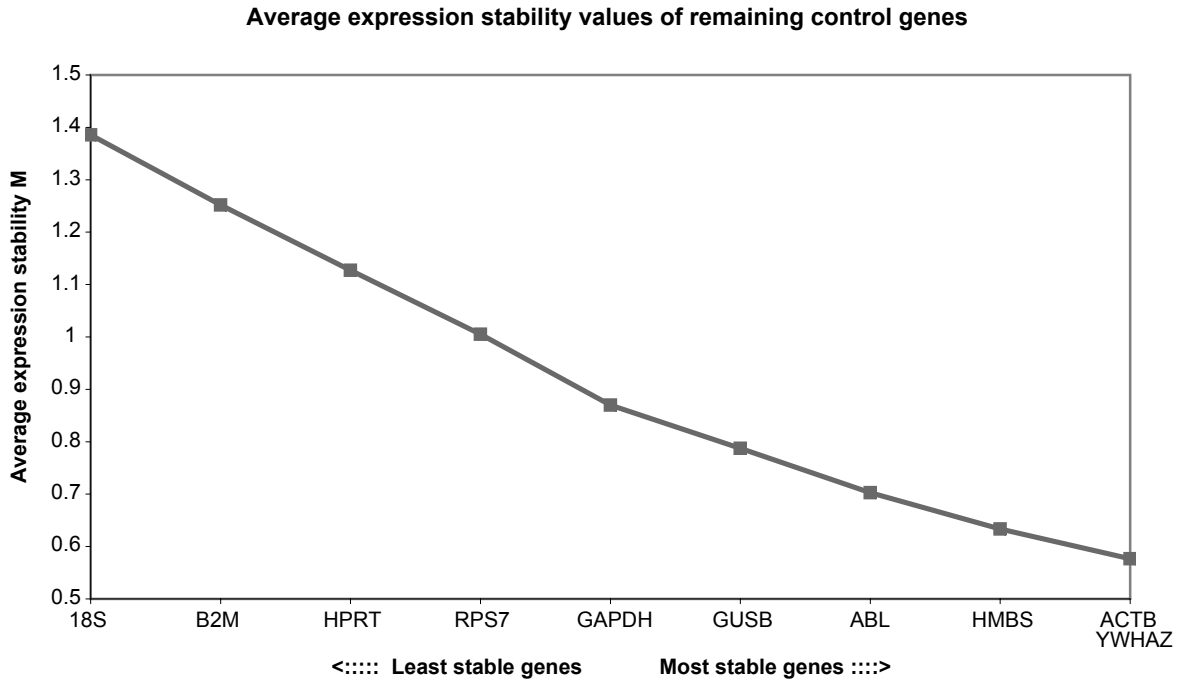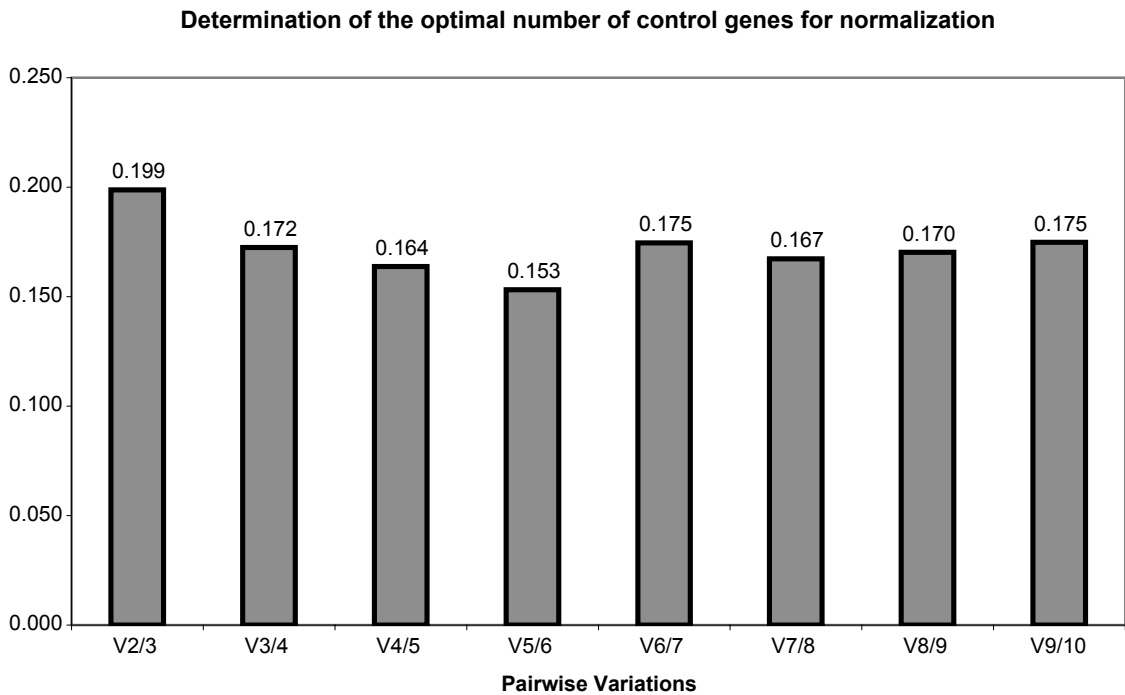

**Additional File 2**  
**k) geNorm output: Liver**

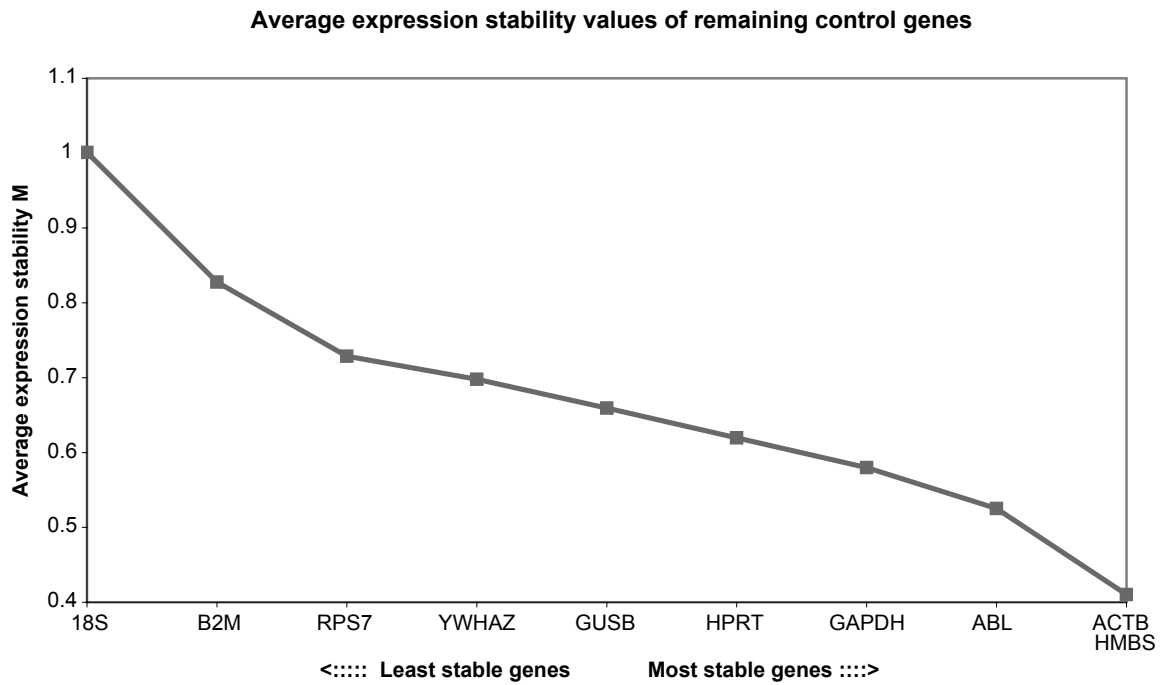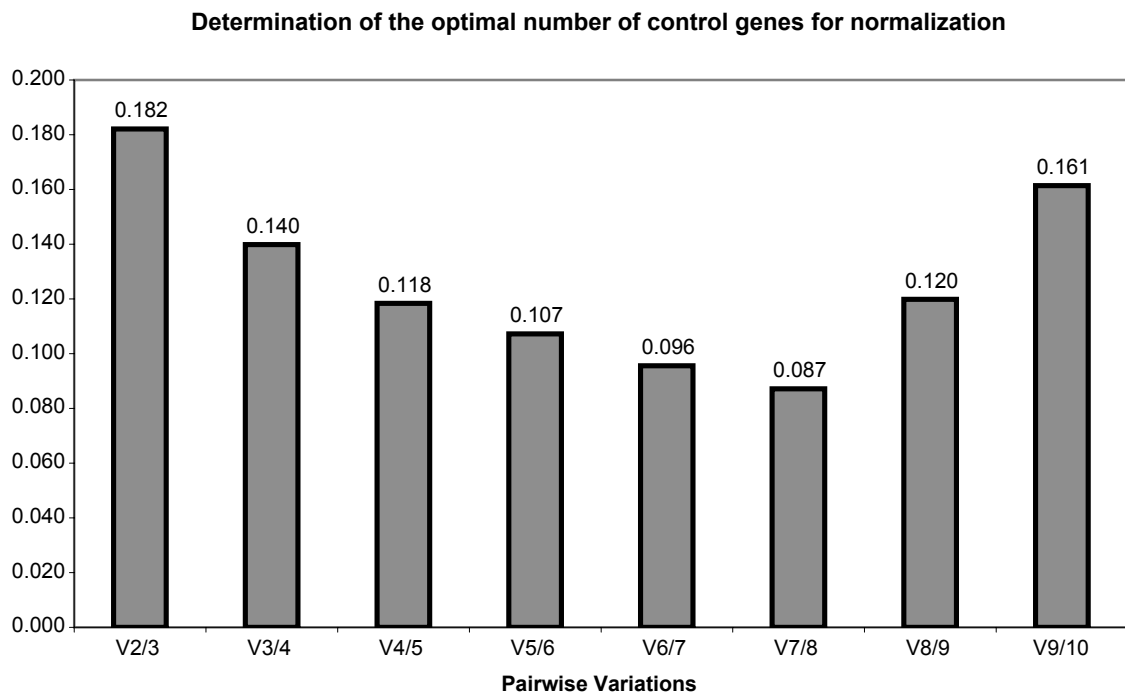

**Additional File 2**  
**l) geNorm output: Kidney**

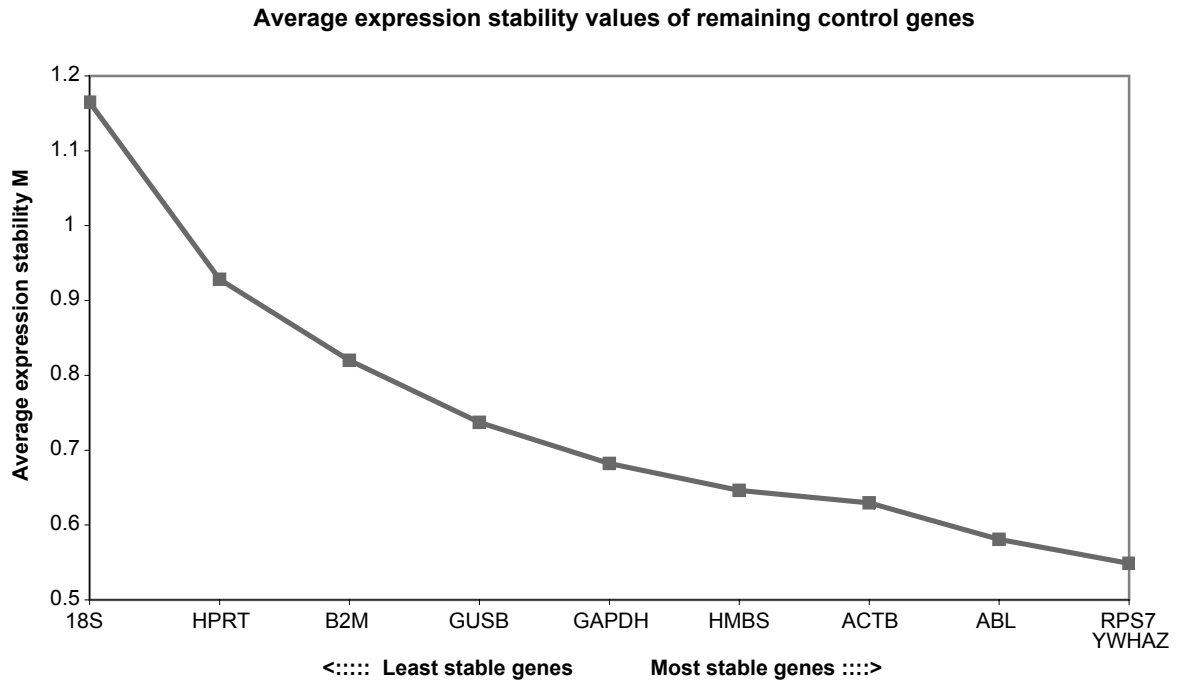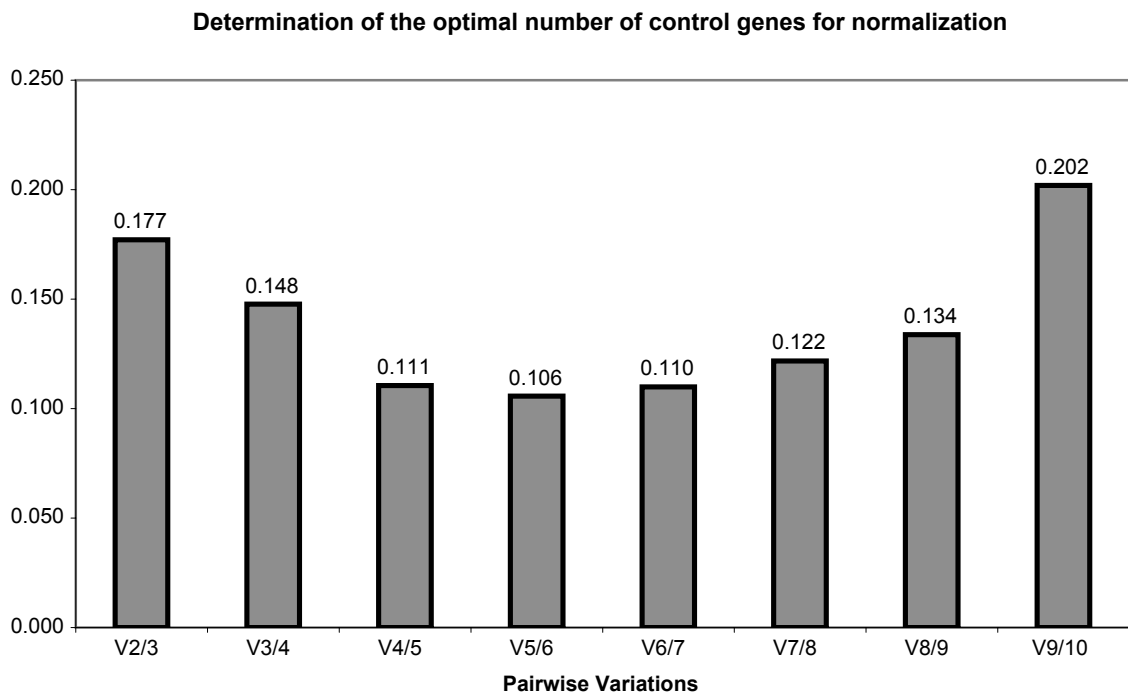

**Additional File 2**  
**m) geNorm output: Myocardium**

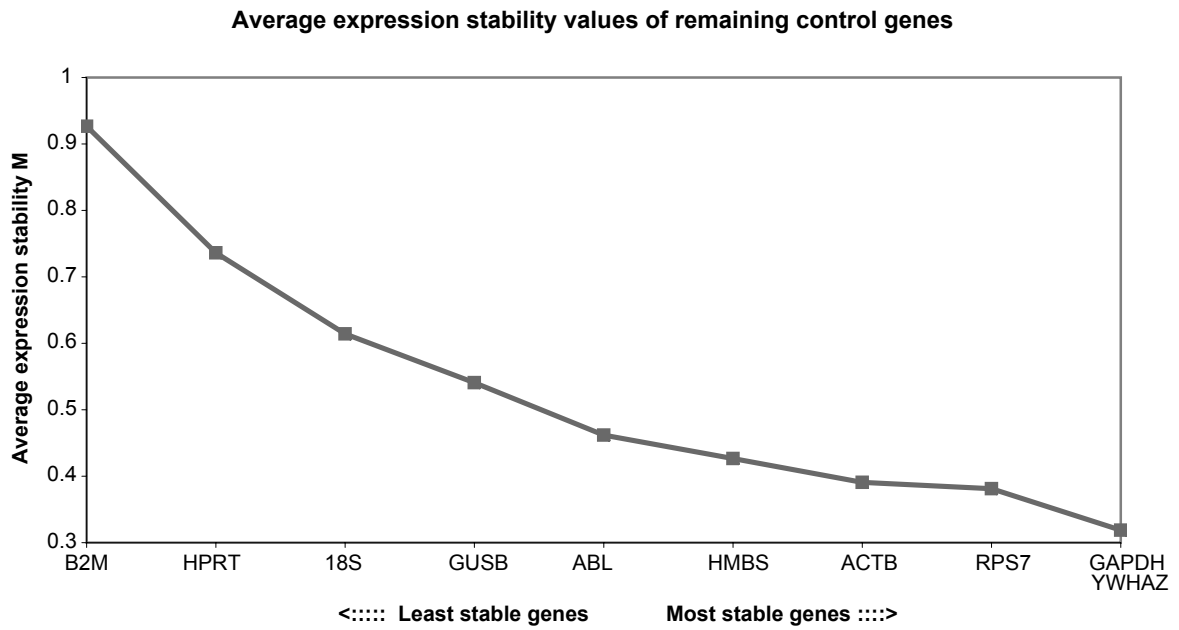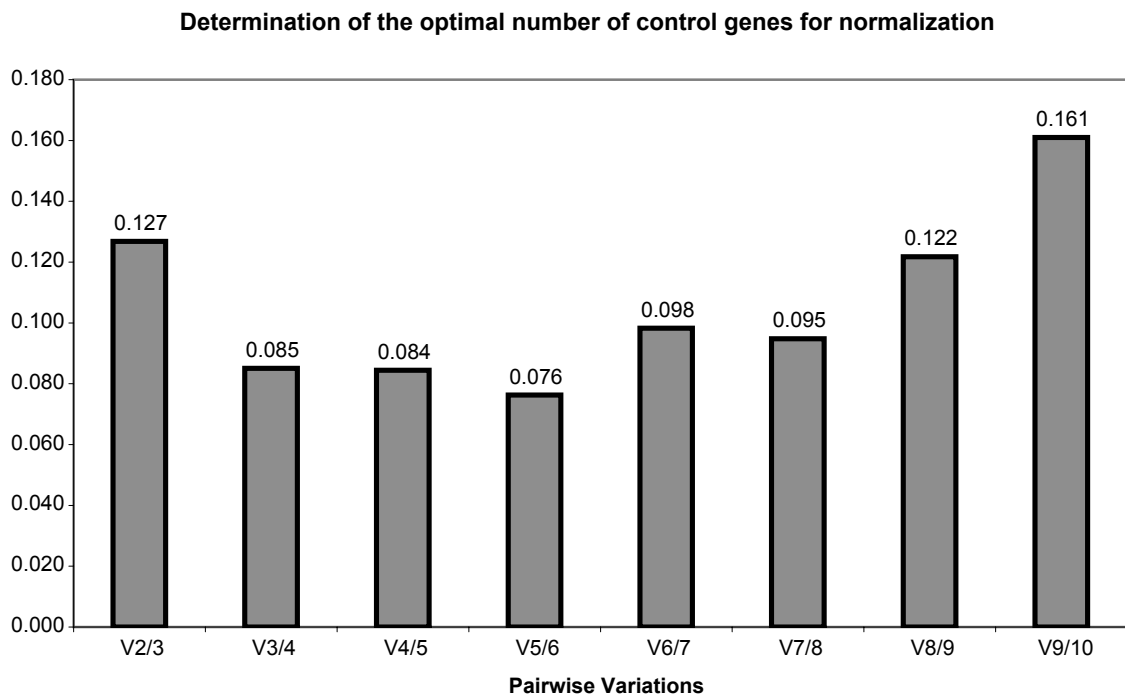

**Additional File 2**  
**n) geNorm output: Brain**

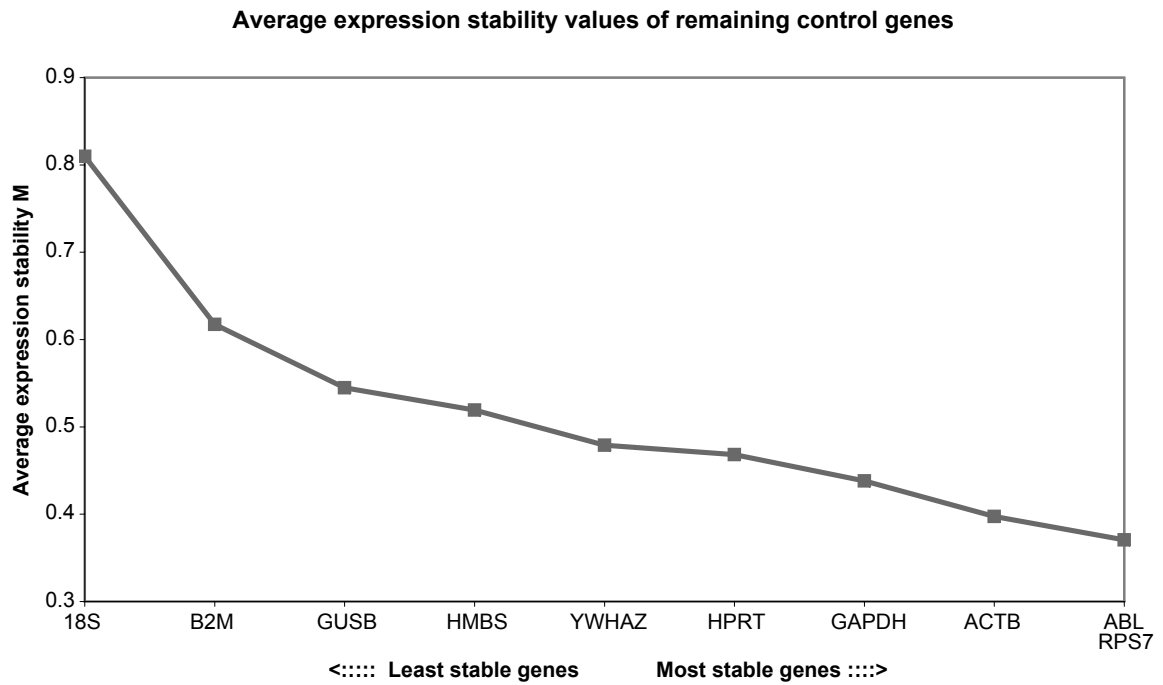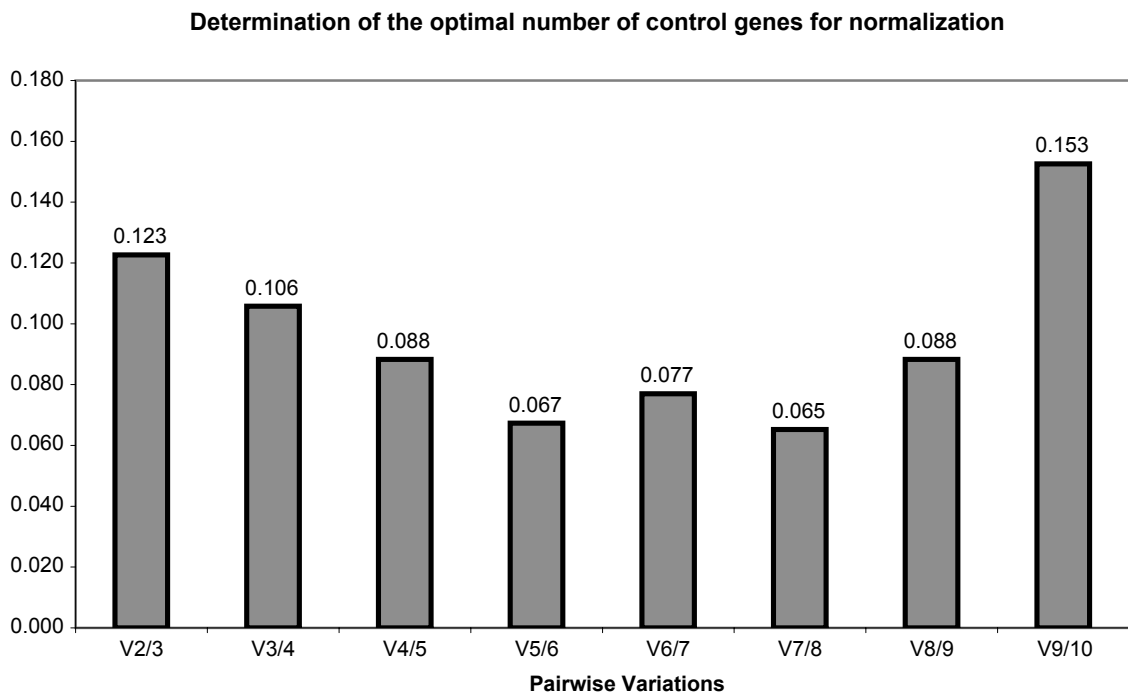

**Additional File 2**  
**o) geNorm output: Blood**

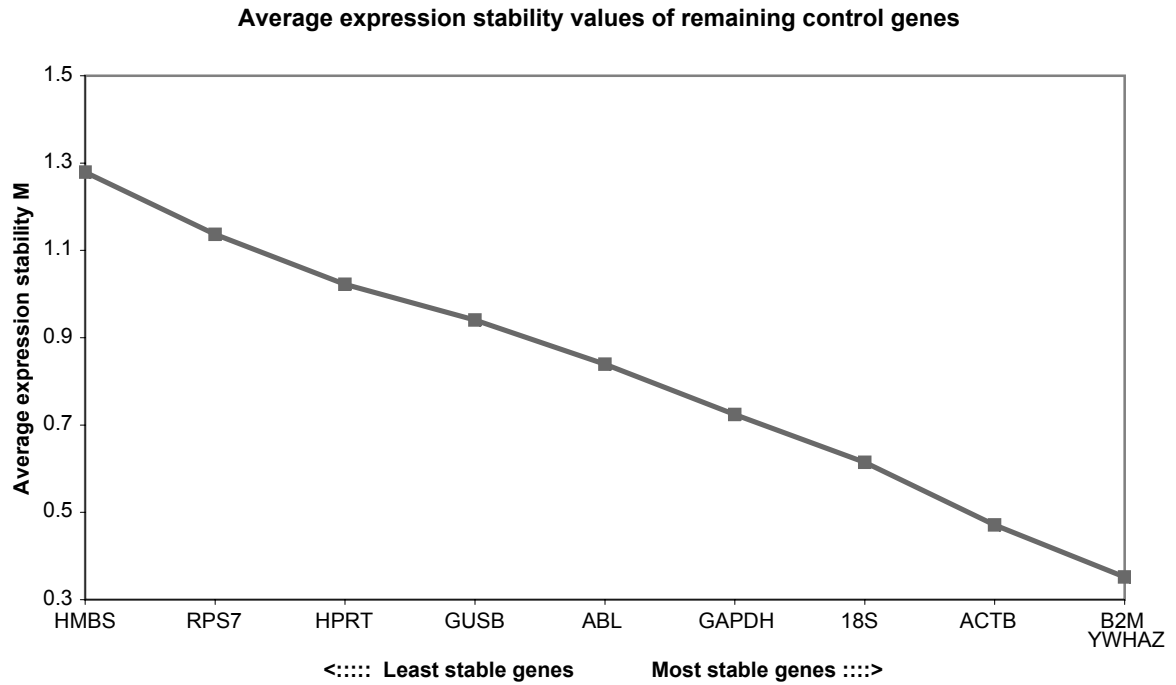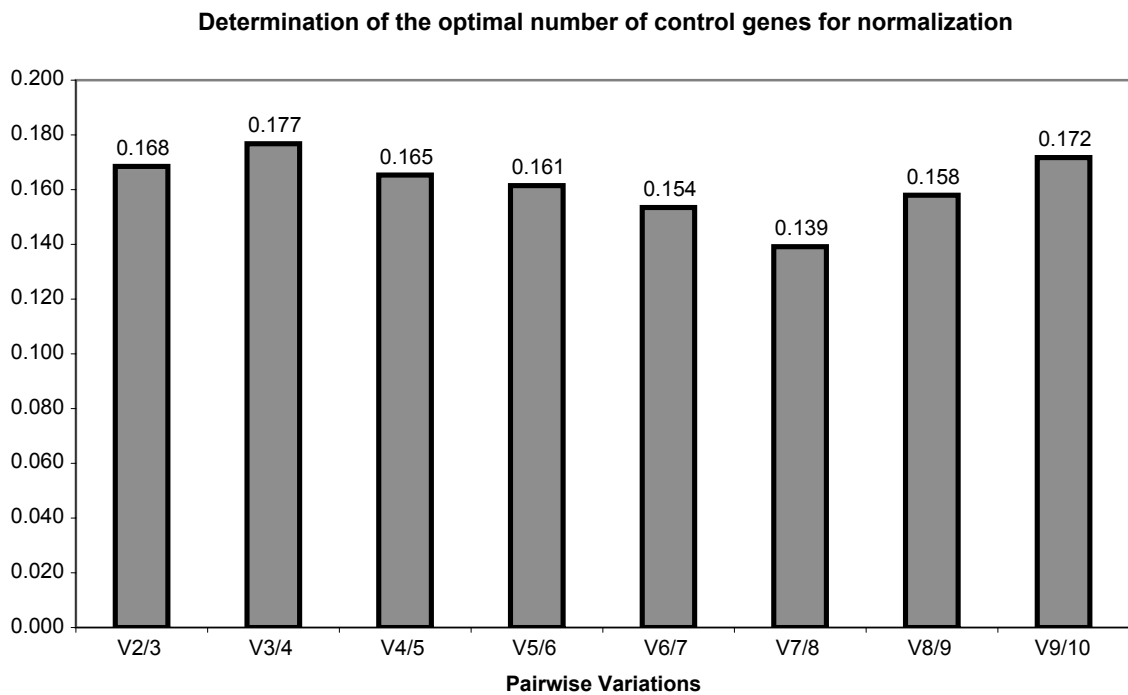

**Additional File 2**

**p) geNorm output: Neoplastic tissues**

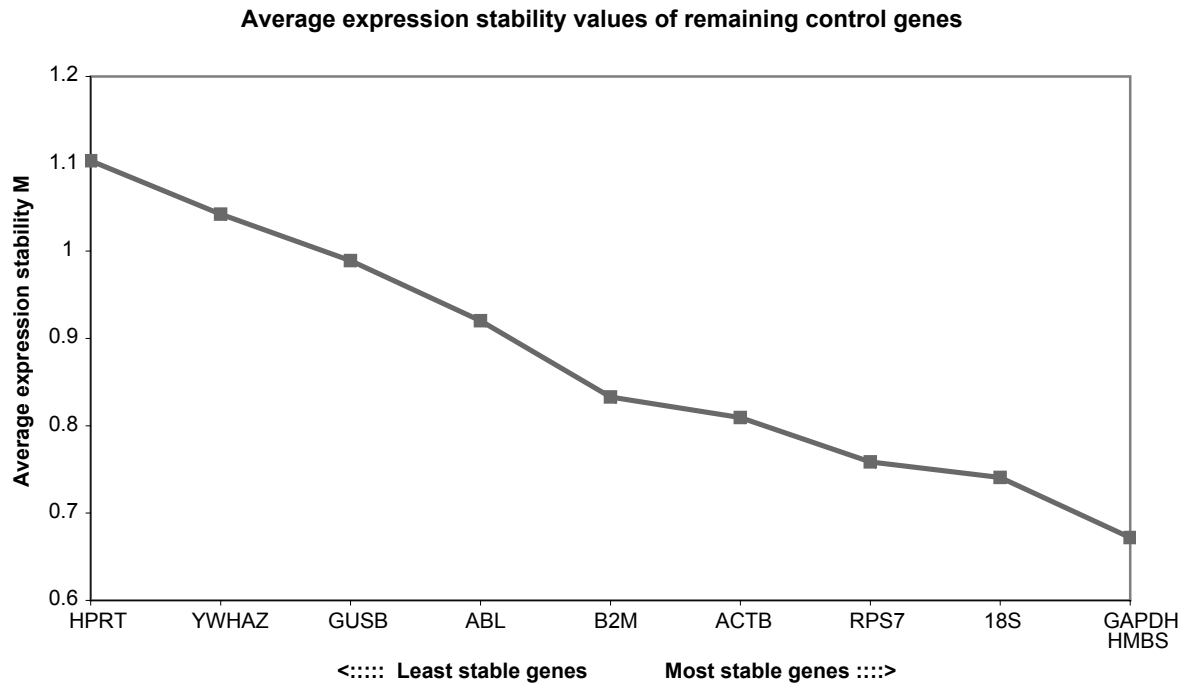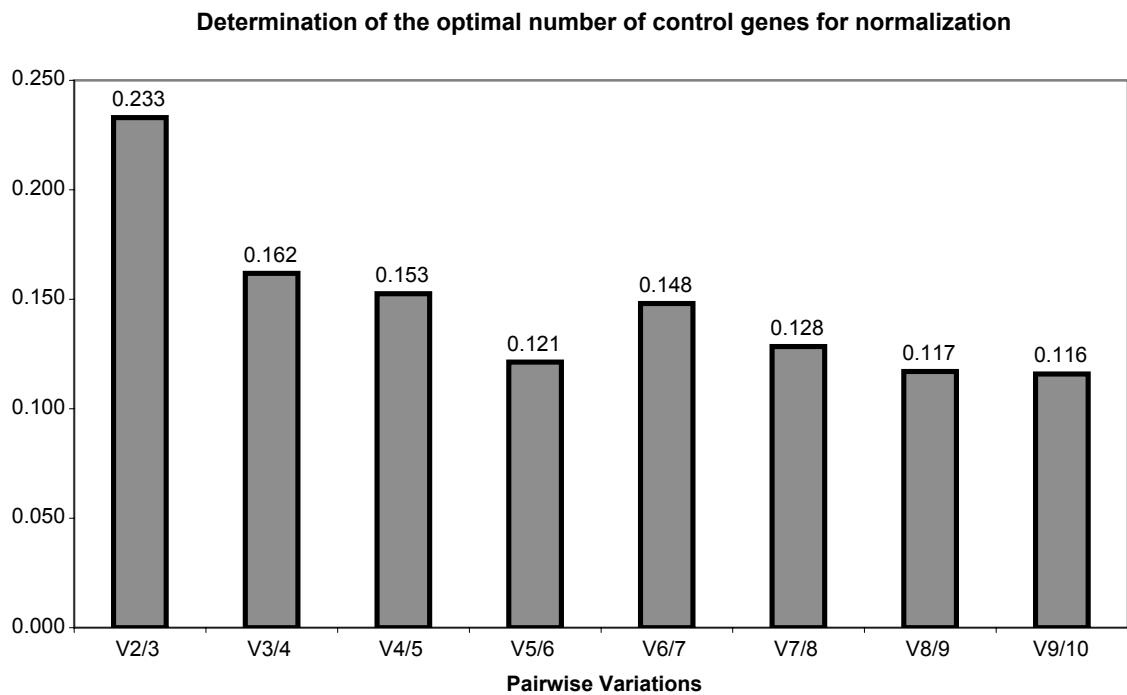

**Additional File 2**

**q) geNorm output: All healthy tissues**

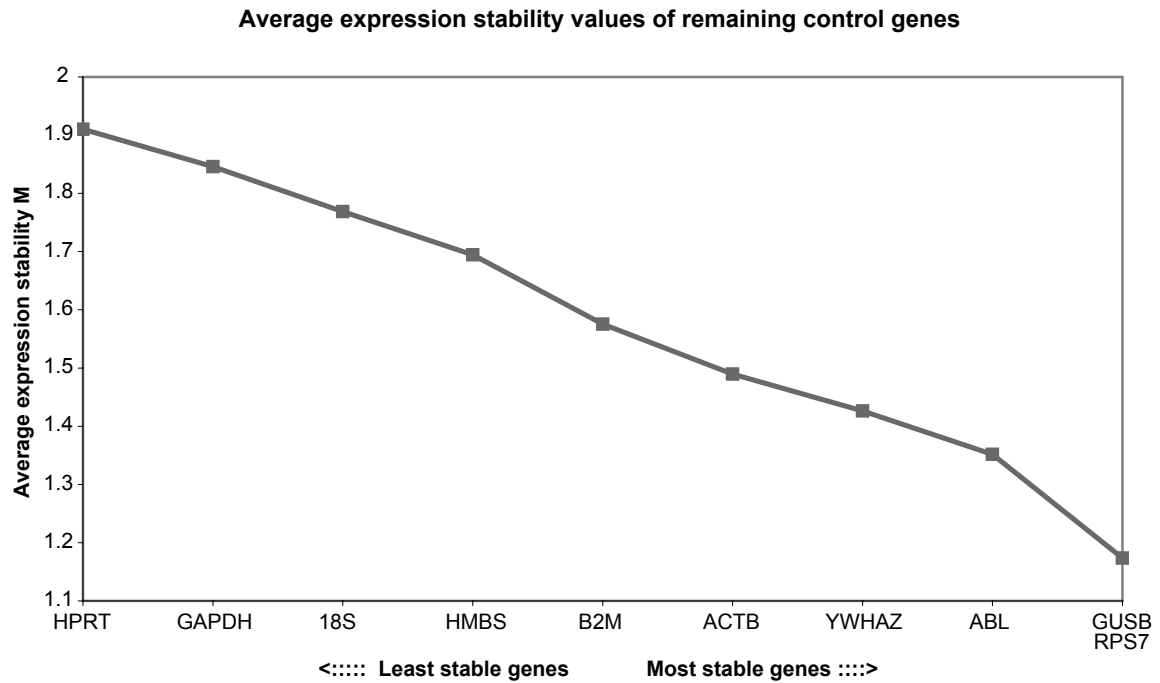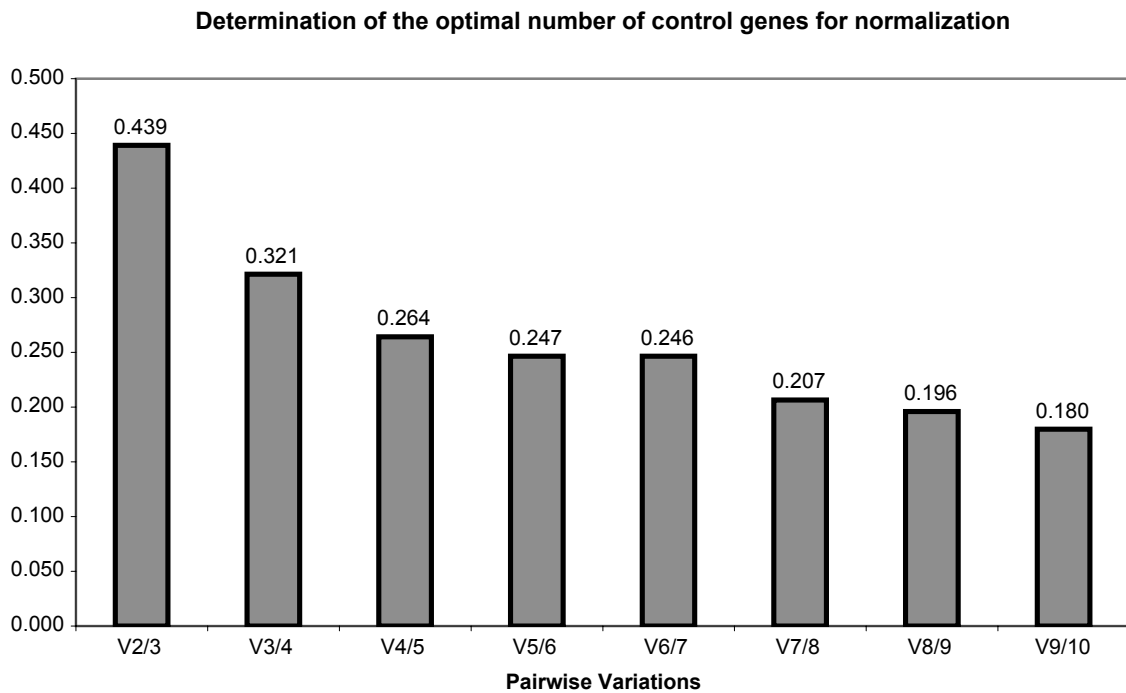

**Additional File 2**

**r) geNorm output: Endocrine tissues**

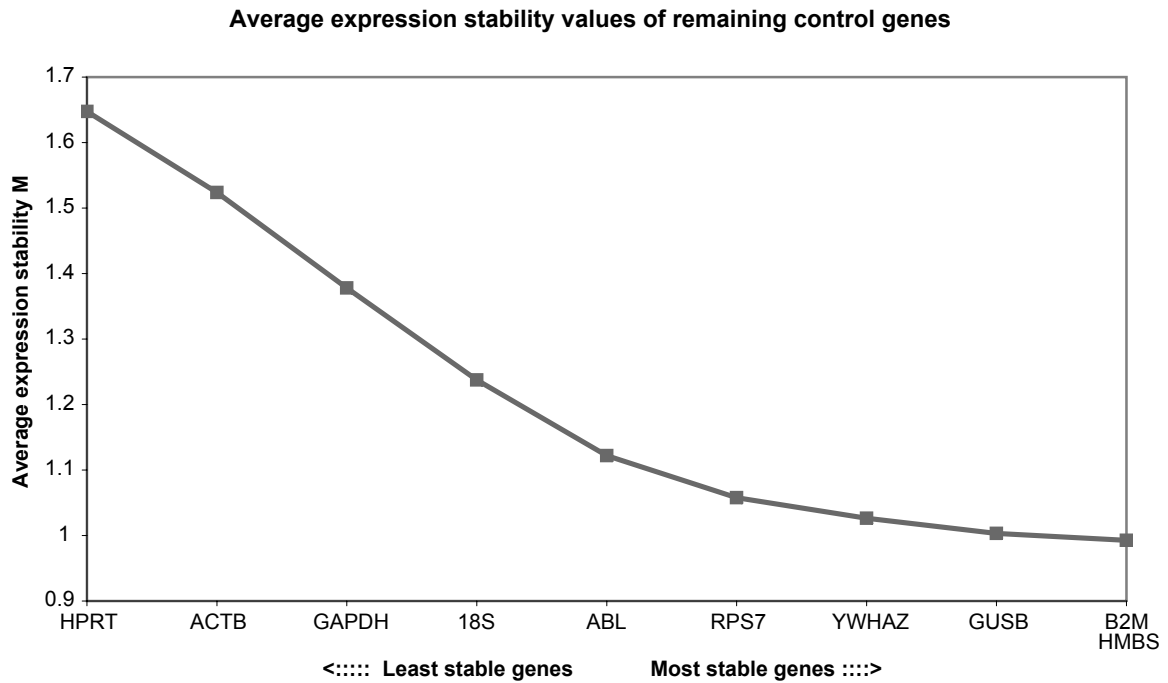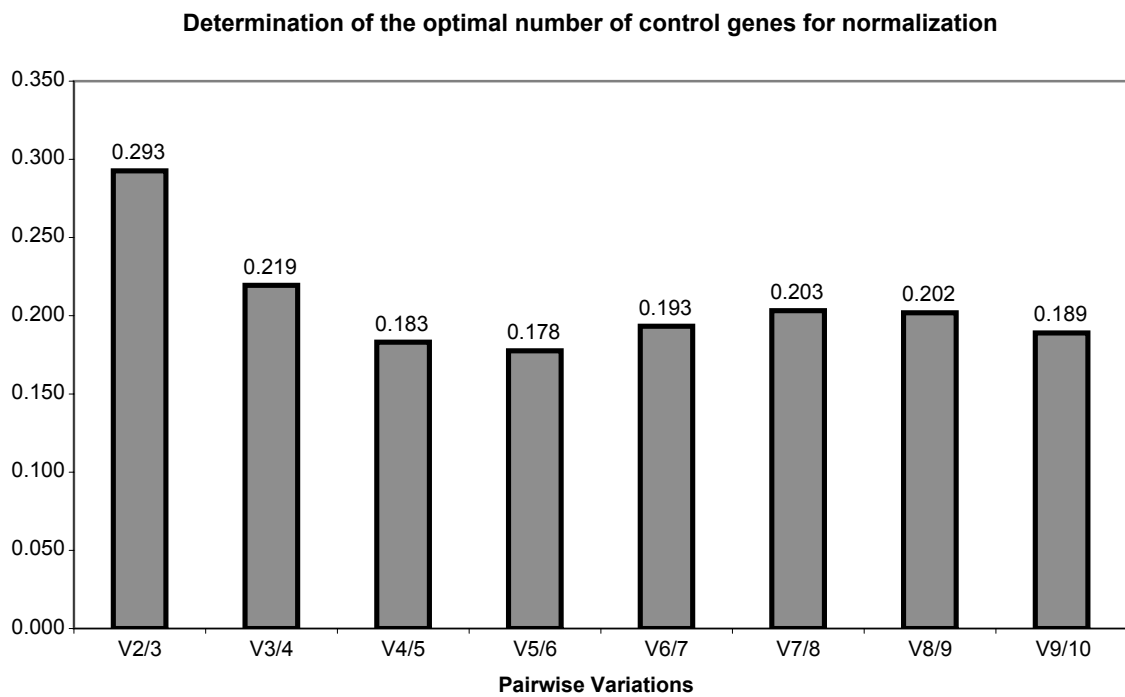

**Additional File 2**  
**s) geNorm output: Lymphoid tissues**

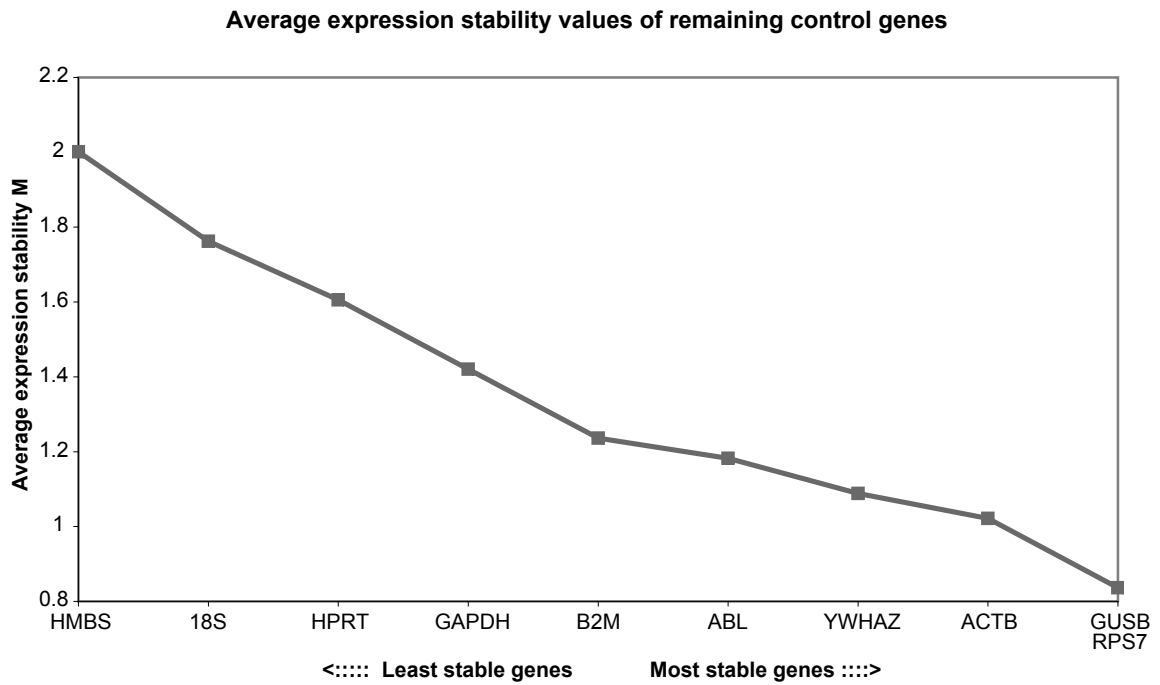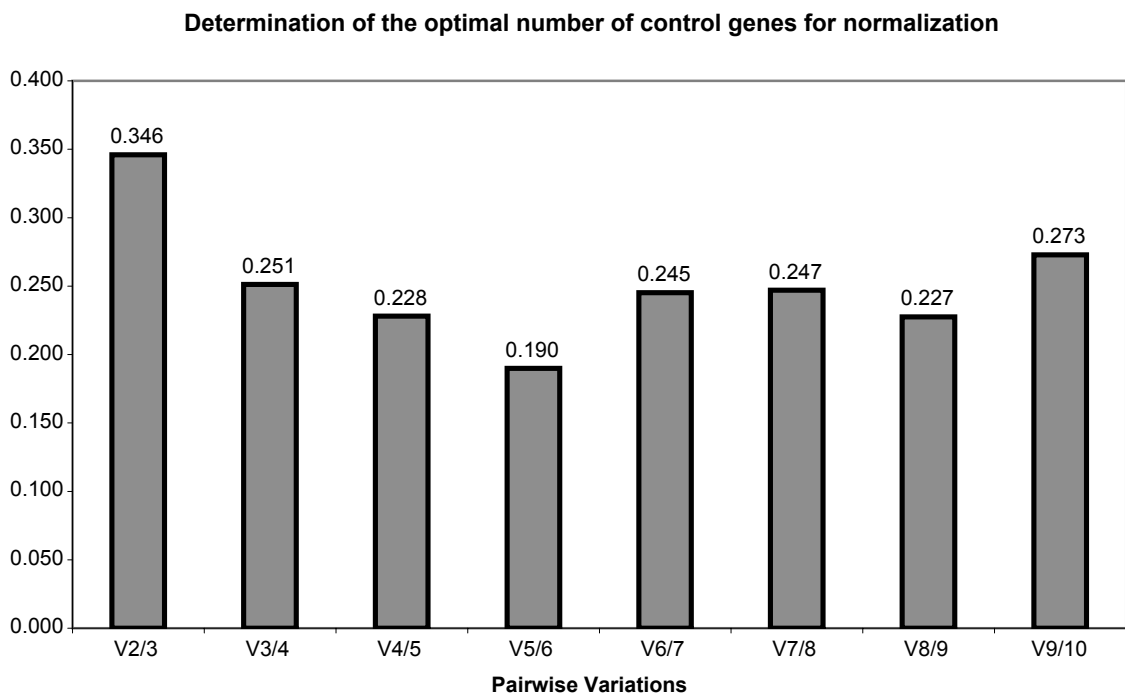

**Additional File 2**

**t) geNorm output: Gastrointestinal tissues**

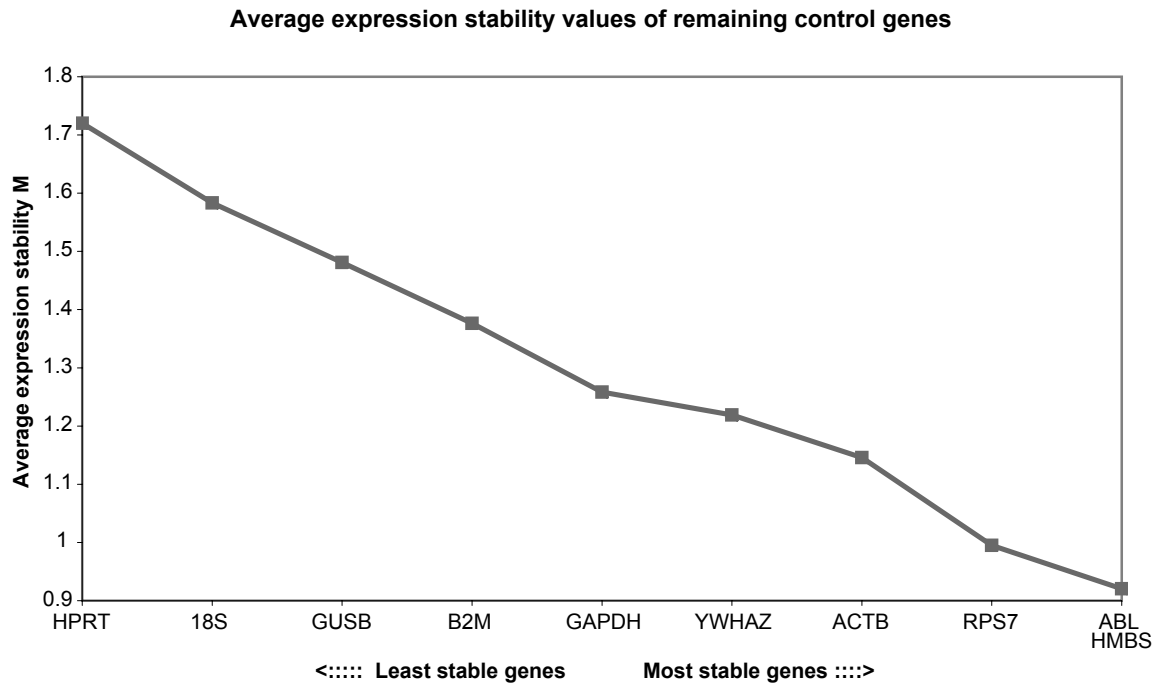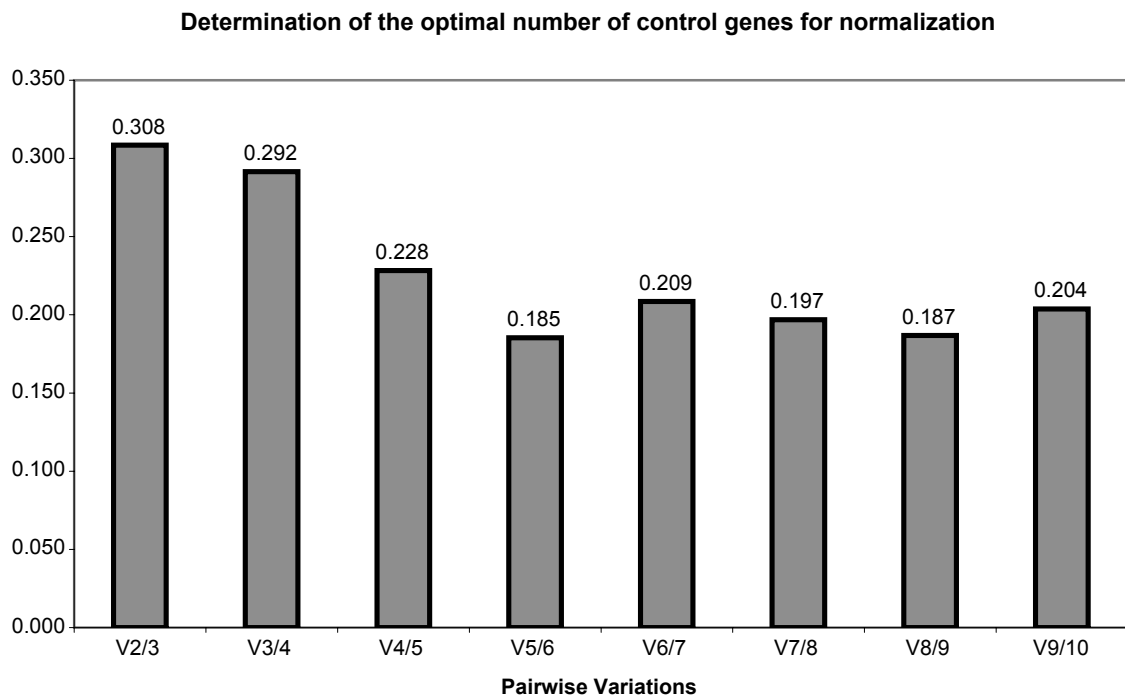

Supplement: Additional file 2 [file 1471-2199-10-106-s2.pdf]
